# Supplementary material for: Implantable RF telemetry for cardiac monitoring in the murine heart: a tutorial review
Source: Springer Nature journal article supplement (doi:10.1186/1687-3963-2013-1), 2013-03-11

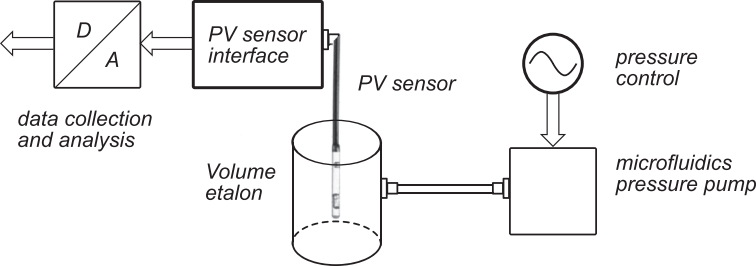

Supplement: 13639_2012_16_MOESM6_ESM.pdf [file 13639_2012_16_MOESM6_ESM.pdf]
